# Supplementary material for: Anchoring atomic antimony in an intercalative Mo–S frameworkviasoft covalent bonding for fast-charging and long-lived sodium ion batteries
Source: Royal Society of Chemistry journal article supplement (doi:10.1039/d3qi00460k), 2023-01-01
Supplement: d3qi00460k1.pdf [file d3qi00460k1.pdf]

## Supporting Information

### **Anchoring Atomic Antimony in an Intercalative Mo–S Framework via Soft Covalent Bonding for Fast-charging and Longevous Sodium Ion Battery**

*Baixin Peng<sup>a,b#</sup>, Zhuoran Lv<sup>a,b#</sup>, Tianxun Cai<sup>a,b</sup>, Zhiyuan Shi<sup>a</sup>, Ce Zhou<sup>c</sup>, Yusha Gao<sup>a,b</sup>, Fuqiang Huang<sup>a,c\*</sup>*

<sup>a</sup>B. Peng, S. Xu, Z. Lv, Y. Gao, Prof. F. Huang

State Key Laboratory of High Performance Ceramics and Superfine Microstructure, Shanghai Institute of Ceramics, Chinese Academy of Sciences, Shanghai 200050, China

<sup>b</sup> B. Peng, Z. Lv, Y. Gao

Center of Materials Science and Optoelectronics Engineering University of Chinese Academy of Sciences, Beijing 100049, China

<sup>c</sup>Prof. F. Huang

Beijing National Laboratory for Molecular Sciences and State Key Laboratory of Rare Earth Materials Chemistry and Applications, College of Chemistry and Molecular Engineering, Peking University, Beijing 100871, China

<sup>#</sup>These authors contribute equally to this work.

E-mail: huangfq@mail.sic.ac.cn

## Experimental section

**Synthesis of Mo<sub>2</sub>SbS<sub>2</sub>:** Mo<sub>2</sub>SbS<sub>2</sub> was synthesized through typical solid state reaction. 2 mmol Mo (99.999%, Alfa Aesar Puratronic), 1 mmol Sb (99.999%, Alfa Aesar Puratronic) and 2 mmol S (99.999%, Alfa Aesar Puratronic) were grinded and mixed uniformly and put into a pre-evacuated quartz tube. Then the quartz tube was sealed by hydrogen flame and putted into a muffle furnace with temperature of 1173 K for 12 hours. After cooling down to room temperature naturally, the micro sphere Mo<sub>2</sub>SbS<sub>2</sub> sample stacked by nano rods was obtained. The as obtained sample was directly used to fabricate electrode slurry.

**Synthesis of NaNi<sub>0.5</sub>Mn<sub>0.5</sub>O<sub>2</sub>:** Stoichiometric amounts of Na<sub>2</sub>CO<sub>3</sub>, NiO, and Mn<sub>2</sub>O<sub>3</sub> were ball milled for 2 h and pressed into pellet. Then the pellet was annealed at 1173 K in a muffle furnace for 24 h. After cooling to room temperature, the black NaNi<sub>0.5</sub>Mn<sub>0.5</sub>O<sub>2</sub> powder was obtained.

**Material characterization:** X-ray diffraction patterns of Mo<sub>2</sub>SbS<sub>2</sub> samples were obtained on a Bruker D8 Advance diffractometer equipped with mirror-monochromatic Cu K $\alpha$  radiation ( $\lambda = 0.15406$  nm) at a scan rate of 12° min<sup>-1</sup> with  $2\theta$  from 5° to 80°. The *in-situ* XRD spectra were obtained on a live discharge/charge process in a cell purchased from Beijing Scistar Technology Co. Ltd. The morphology of Mo<sub>2</sub>SbS<sub>2</sub> was investigated by a JEOL (JSM6510) scanning electron microscope equipped with energy dispersive X-ray spectroscopy (EDXS, Oxford Instruments) and aberration-corrected field transmission electron microscopy (FEI Tecnai F20, USA). Raman spectra was

obtained from a Jobin-Yvon LabRAM HR-800 spectrometer with a laser excitation at 532 nm. Electrical conductivity test was conducted on a physical properties measurement system (PPMS, Quantum Design). The High resolution XPS spectra were obtained from an X-ray photoelectron spectrometer (XPS, Thermo Scientific, ESCALAB 250, USA).

**Electrochemical characterization:** The composite electrodes were fabricated from the active materials  $\text{Mo}_2\text{SbS}_2$  powder (80 wt%), super P (10 wt%) and sodium alginate (SA) binder, and deionized water was utilized as solvent to get a slurry. Then the slurry was coated evenly on a copper foil using a blade with mass loading of  $\sim 1.5 \text{ mg cm}^{-2}$ . The electrode was then dried at a vacuum oven at  $80 \text{ }^\circ\text{C}$  for 8 h. The half cells were assembled in coin-type cells (MTI corporation-CR2032) within an Ar gas filled glove box. A piece of sodium was utilized as counter electrode. For the full battery, cathode was prepared by mixing  $\text{NaNi}_{0.5}\text{Mn}_{0.5}\text{O}_2$  (80 wt%), Super P (10 wt%) and polyvinylidene fluoride (PVDF) binder (10 wt%) homogeneously in N-methyl pyrrolidinone (NMP) solvent to get a slurry. Then the slurry was coated on an aluminum foil. The anode was made through the same process for half-cell. The N : P ratio of full cell is 1.1 : 1. The electrolyte is composed of 1 M  $\text{NaPF}_6$  in DME solution. Glass fiber is utilized as a separator.

A CHI1760e electrochemical workstation was used for the cyclic voltammetry (CV) tests with a potential range between 3 V and 0.01 V at different scan rates. A Land CT2001A tester (Wuhan, China) was applied to get the galvanostatic cycling performance and the GITT voltage profile of the assembled cells with a cutoff voltage

between 3 V and 0.01 V at room temperature. Electrochemical impedance spectroscopy (EIS) was also tested with a CHI1760e electrochemical workstation at the frequency of 0.1 to 10000 Hz.

**Theoretical capacity calculation:** The electrode reactions in Mo<sub>2</sub>SbS<sub>2</sub> anode based on our results are summarized as following:

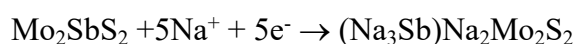

The theoretical capacity ( $C_t = 355 \text{ mA h g}^{-1}$ ) is calculated according to equation:

$$C_t = nF/3.6M_r \quad (1)$$

where,  $n$  is the number of transferred electrons,  $F$  is Faraday constant ( $96485 \text{ C mol}^{-1}$ ),  $M_r$  is the molar mass of Mo<sub>2</sub>SbS<sub>2</sub> ( $378 \text{ g mol}^{-1}$ ).

**Density functional theory (DFT) calculation details:** The Vienna initio simulation package (VASP) code with the projector augmented wave (PAW) method were used to perform our DFT calculation. The Perdew-Burke-Ernzerhof (PBE) exchange-correlation functional was used in our calculations. The kinetic energy cutoff is set to be 300 eV for the expanding the wave functions into a plane-wave basis. For the structure optimizations,  $5 \times 10 \times 4$  k-points were used for the conventional cell. The internal atomic positions were relaxed until the force is less than  $0.01 \text{ eV/\AA}$ . The energy convergence criterion was  $10^{-5} \text{ eV}$ . For the band structure calculation, high-symmetry points in the Brillouin zone (G, Z, D, B, G, A, E, Z, C, Y and G corresponding to (0, 0, 0), (0, 0.5, 0), (0, 0.5, 0.5), (0, 0, 0.5), (0, 0, 0), (-0.5, 0, 0.5), (-0.5, 0.5, 0.5), (0, 0.5, 0), (-0.5, 0.5, 0), (-0.5, 0, 0) and (0, 0, 0) points) were utilized.

S

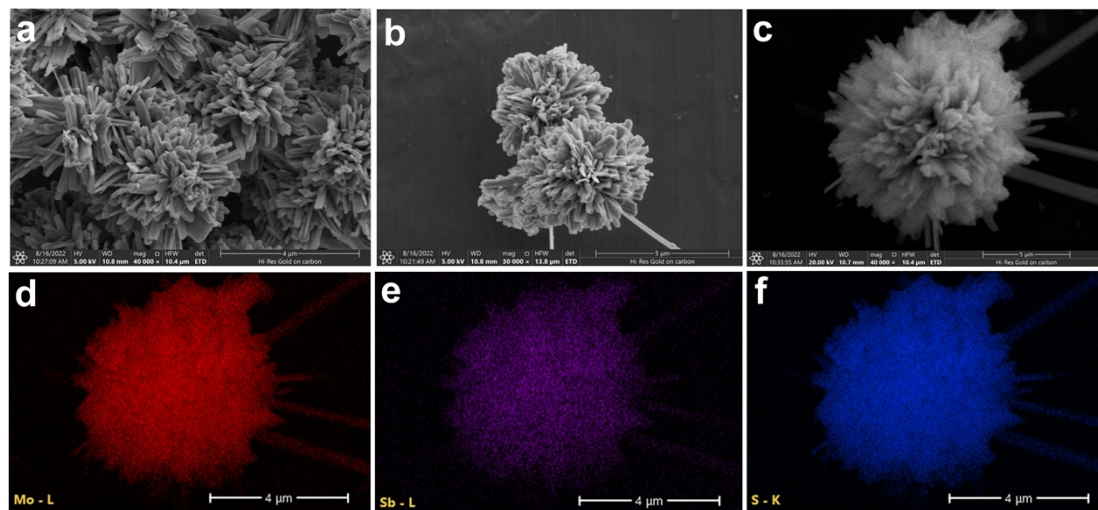

Figure S1. a, b) SEM images of  $\text{Mo}_2\text{SbS}_2$  micro sphere; c-f) element mapping images of Mo, Sb and S.

Table R1. Relative intensities of the top five XRD peaks of  $\text{Mo}_2\text{SbS}_2$ .

|        | Observed | Standard |
|--------|----------|----------|
| (001)  | 62       | 79       |
| (100)  | 100      | 100      |
| (012)  | 71       | 89       |
| (20-3) | 70       | 68       |
| (112)  | 97       | 82       |

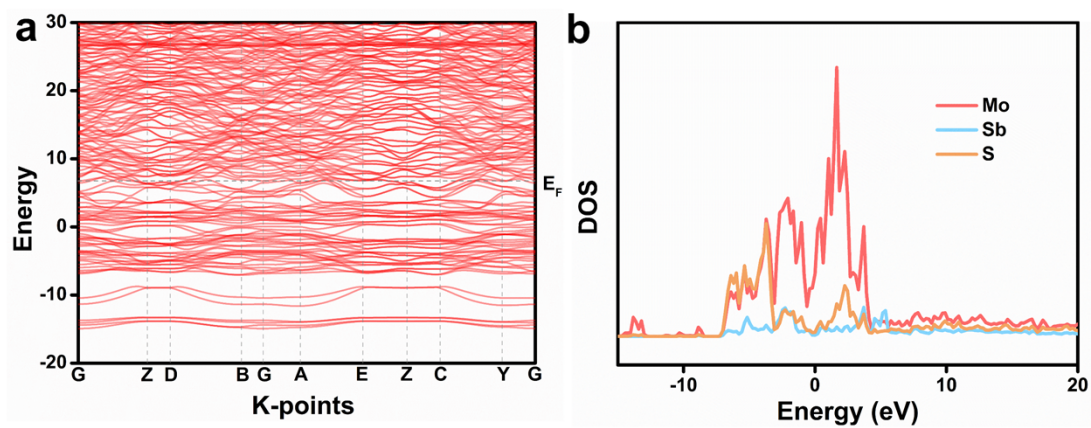

Figure S2. a) Band structure of  $\text{Mo}_2\text{SbS}_2$ ; b) PDOS of Mo, Sb and S.

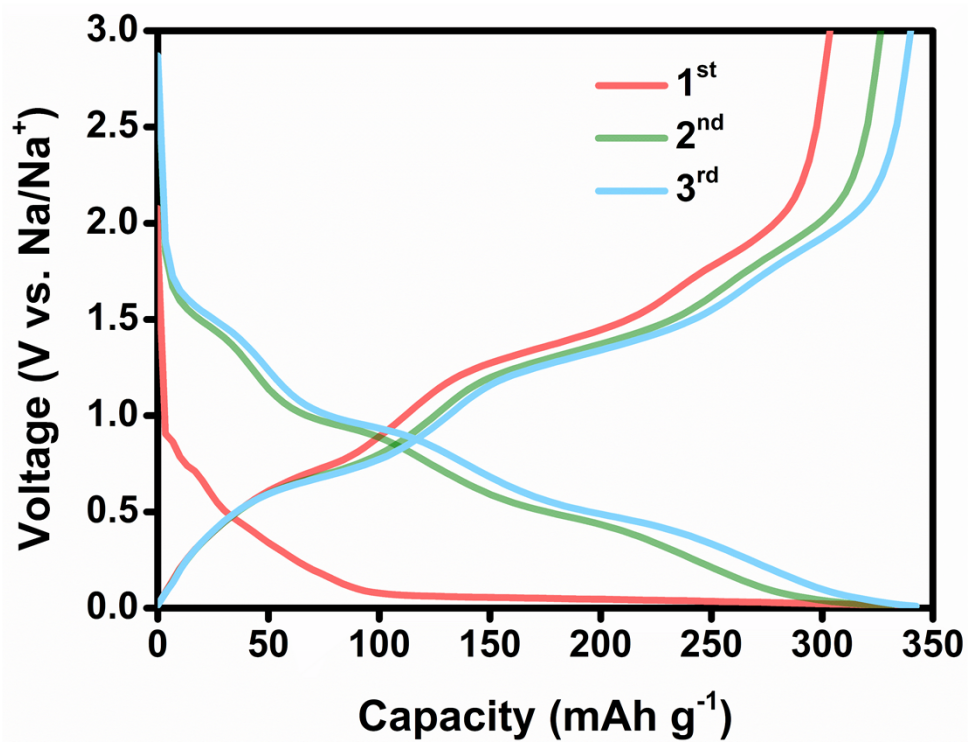

Figure S3. GCD profiles of  $\text{Mo}_2\text{SbS}_2$  anode at initial 3 cycles.

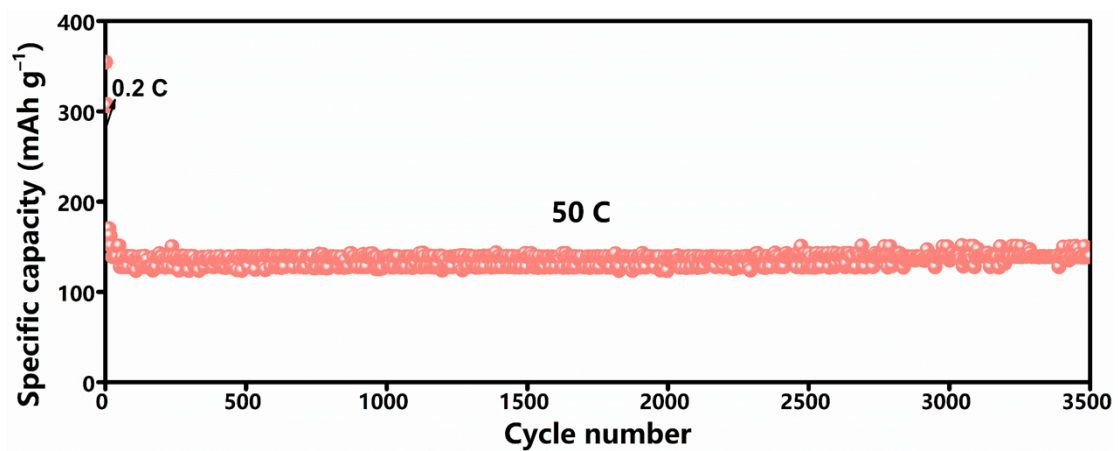

Figure S4. Cycling performance of  $\text{Mo}_2\text{SbS}_2$  anode at current density of 50 C.





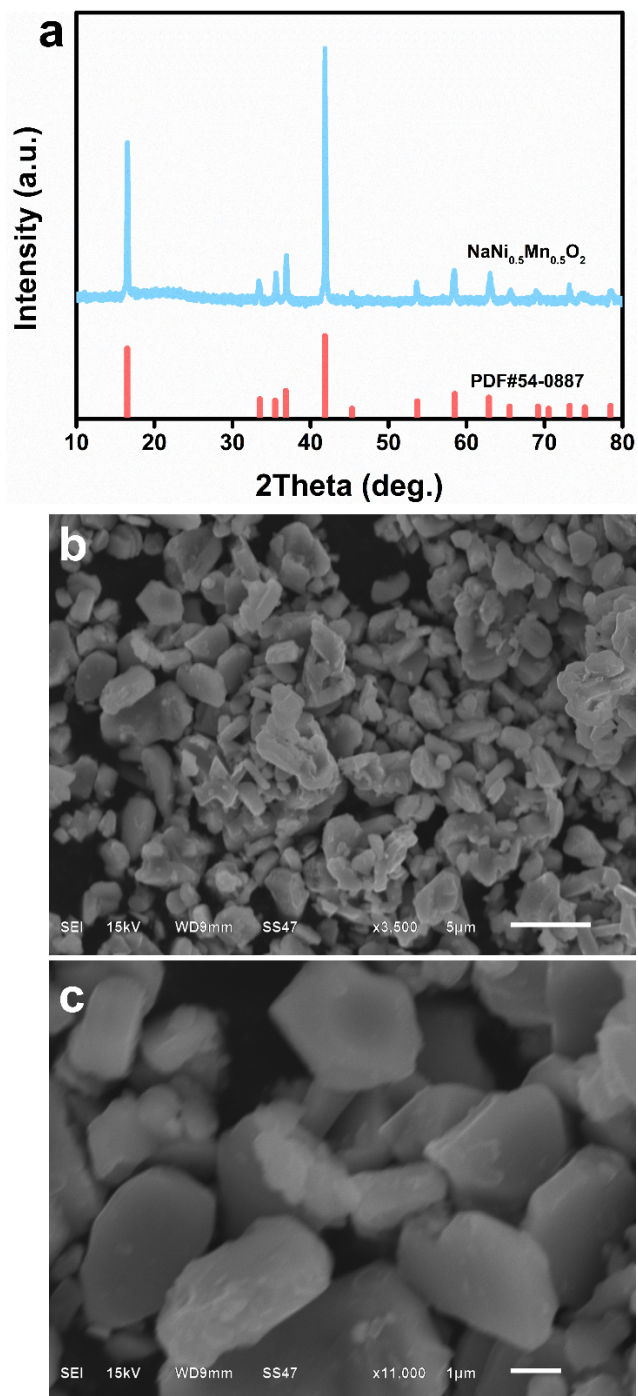

Figure S5. a) XRD pattern of NaNi<sub>0.5</sub>Mn<sub>0.5</sub>O<sub>2</sub>; b-c) SEM images of NaNi<sub>0.5</sub>Mn<sub>0.5</sub>O<sub>2</sub> at different resolution.
